# Supplementary material for: Ceftriaxone and the Risk of Ventricular Arrhythmia, Cardiac Arrest, and Death Among Patients Receiving Lansoprazole
Source: PubMed Central journal article supplement (PMC10603497; doi:10.1001/jamanetworkopen.2023.39893), 2023-10-26
Supplement: jamanetwopen-e2339893-s001.pdf [file jamanetwopen-e2339893-s001.pdf]

## Supplementary Online Content

Bai AD, Wilkinson A, Almufleh AS, et al. Ceftriaxone and the risk of ventricular arrhythmia, cardiac arrest, and death among patients receiving lansoprazole. *JAMA Netw Open*. 2023;6(10):e2339893. doi:10.1001/jamanetworkopen.2023.39893

**eTable 1.** ICD-10-CA Codes for Risk Factors of Ventricular Arrhythmia and Primary Outcome

**eTable 2.** List of Medications That Increase Risk of Ventricular Arrhythmia

**eTable 3.** Timing and Duration of Ceftriaxone and PPI

**eTable 4.** Excluded Patients on No Proton Pump Inhibitor and Patients With Missing Data

**eTable 5.** Proportion of Patients Who Were Also Prescribed Another Proton Pump Inhibitor During Hospital Stay in the Lansoprazole and Other Proton Pump Inhibitor Group

**eTable 6.** Hospital Sites Description

**eTable 7.** The Association of A Priori Selected Predictor With Ventricular Arrhythmia or Cardiac Arrest in Logistic Regression Model

**eTable 8.** Risk of Ventricular Arrhythmia or Cardiac Arrest, and In-Hospital Mortality per Year From 2015 to 2021

**eTable 9.** Baseline Characteristics Within Subgroup Analysis of Patients Not Admitted to ICU Prior to Ceftriaxone and PPI

**eTable 10.** Outcomes Within Subgroup Analysis of Patients Not Admitted to ICU Prior to Ceftriaxone and PPI

**eTable 11.** Baseline Characteristics Within Subgroup Analysis of Patients Who Received Either Only Lansoprazole or Only Pantoprazole Without Being Exposed to Any Other PPI During Hospital Stay

**eTable 12.** Outcomes Within Subgroup Analysis of Patients Who Received Either Only Lansoprazole or Only Pantoprazole Without Being Exposed to Any Other PPI During Hospital Stay

**eTable 13.** Sensitivity Analysis of Outcomes During Hospital Stay That Includes Patients With Missing mLAPS and Assumes Best-Worst-Case Scenario for Unknown Exposure

**eTable 14.** Other Sensitivity Analyses

This supplementary material has been provided by the authors to give readers additional information about their work.

eTable 1. *ICD-10-CA* codes for risk factors of ventricular arrhythmia and primary outcome

| Diagnoses                                                 | <i>ICD-10-CA</i> codes                                                                                                      |
|-----------------------------------------------------------|-----------------------------------------------------------------------------------------------------------------------------|
| Risk factors for ventricular arrhythmia                   |                                                                                                                             |
| Coronary artery disease                                   | I20.x, I24.x<br>I25.1, I25.6, I25.8, I25.9<br>Z95.1                                                                         |
| Prior myocardial infarction                               | I21.x, I22.x, I23.x<br>I24.1, I25.2                                                                                         |
| Heart failure                                             | I11.0<br>I13.0, I13.2<br>I50.x<br>I97.1<br>T86.2, T86.3                                                                     |
| Cardiomyopathy                                            | I25.5<br>I42.x, I43.x<br>I51.7<br>E63.9<br>O90.3                                                                            |
| Prior history of ventricular arrhythmia or cardiac arrest | I46.x<br>I47.0, I47.2<br>I49.0, I49.3, I49.4, I49.8                                                                         |
| Chronic kidney disease                                    | I12.0, I13.1<br>N03.x, N05.x, N18.x, N19.x<br>N25.0<br>Z49.x<br>Z94.0, Z99.0                                                |
| Outcome                                                   |                                                                                                                             |
| Ventricular arrhythmia                                    | I47.0 (re-entry ventricular arrhythmia)<br>I47.2 (ventricular tachycardia)<br>I49.0x (ventricular fibrillation and flutter) |
| Cardiac arrest                                            | I46.x (cardiac arrest)                                                                                                      |

x means all possible numbers

Reference for *ICD-10-CA* codes: <https://secure.cihi.ca/estore/productSeries.htm?pc=PCC189>

eTable 2. List of medications that increase risk of ventricular arrhythmia

| Category            | Medications                                                                                                                                                                                                                                                                                                                                                     |
|---------------------|-----------------------------------------------------------------------------------------------------------------------------------------------------------------------------------------------------------------------------------------------------------------------------------------------------------------------------------------------------------------|
| Fluoroquinolones    | ciprofloxacin, moxifloxacin, levofloxacin                                                                                                                                                                                                                                                                                                                       |
| Macrolides          | azithromycin, erythromycin, clarithromycin                                                                                                                                                                                                                                                                                                                      |
| Cardiac medications | amiodarone, disopyramide, dofetilide, dronedarone, hydroquinidine, flecainide, ibutilide, niferidil, procainamide, propafenone, quinidine, sotalol, digoxin, dobutamine, milrinone, epinephrine, norepinephrine, dopamine, isoprenaline, ephedrine                                                                                                              |
| Other medications   | bupropion, escitalopram, citalopram, desipramine, imipramine, trazodone, venlafaxine, lithium, chlorpromazine, thioridazine, haloperidol, levomeprazin, levosulpride, pimozide, ulpiride, sultopride, domperidone, ondansetron, metoclopramide, diphenhydramine, fluconazole, itraconazole, ketoconazole, methadone, donepezil, hydroxychloroquine, chloroquine |

Reference: Tisdale JE, Chung MK, Campbell KB, Hammadah M, Joglar JA, Leclerc J, Rajagopalan B, American Heart Association Clinical Pharmacology Committee of the Council on Clinical Cardiology and Council on Cardiovascular and Stroke Nursing. Drug-induced arrhythmias: a scientific statement from the American Heart Association. *Circulation*. 2020;142(15):e214-33.

eTable 3. Timing and duration of ceftriaxone and PPI

|                                                  | Description                                                                                                                                                            |
|--------------------------------------------------|------------------------------------------------------------------------------------------------------------------------------------------------------------------------|
| Time from admission to first dose of ceftriaxone | Median (IQR) of 0 (0,1) days<br>26,532 (85.2%) patients received ceftriaxone within 1 day of admission                                                                 |
| Duration of ceftriaxone treatment                | Median (IQR) of 4 (1,6) days for all patients<br>Median (IQR) of 6 (2, 8) days for the lansoprazole group<br>Median (IQR) of 3 (1, 6) days for the other PPI group     |
| Time from admission to first dose of PPI         | Median (IQR) of 0 (0,1) days<br>26,232 (84.2%) received PPI within 1 day of admission                                                                                  |
| Duration of PPI treatment                        | Median (IQR) of 6 (3, 13) days for all patients<br>Median (IQR) of 9 (4, 22) days for the lansoprazole group<br>Median (IQR) of 6 (3, 12) days for the other PPI group |

IQR = interquartile range; PPI = proton-pump inhibitor

eTable 4. Excluded patients on no proton pump inhibitor and patients with missing data

|                                                  | Lansoprazole<br>(N=3,747) | Other PPI<br>(N=27,405) | Excluded patients<br>on ceftriaxone and<br>no PPI<br>(N=49,573) | Patients with<br>missing data<br>(N=2,895) |
|--------------------------------------------------|---------------------------|-------------------------|-----------------------------------------------------------------|--------------------------------------------|
| Age Mean (SD)                                    | 74.0 (15.9)               | 71.4 (16.0)             | 69.7 (19.0)                                                     | 72.0 (18.2)                                |
| Sex                                              |                           |                         |                                                                 |                                            |
| Female                                           | 1,772 (47.3%)             | 13,245 (48.3%)          | 23,414 (47.2%)                                                  | 1,411 (48.7%)                              |
| Male                                             | 1,975 (52.7%)             | 14,160 (51.7%)          | 26,159 (52.8%)                                                  | 1,484 (51.3%)                              |
| From a long-term care home                       | 574 (15.3%)               | 5,345 (6.9%)            | 3,750 (7.6%)                                                    | 160 (5.5%)                                 |
| Hospital sites                                   |                           |                         |                                                                 |                                            |
| A                                                | 452 (12.1%)               | 5,118 (18.7%)           | 6,346 (12.8%)                                                   | 63 (2.2%)                                  |
| B                                                | 0 (0%)                    | 10 (0.04%)              | 356 (0.7%)                                                      | 1 (0.03%)                                  |
| C                                                | 439 (11.7%)               | 3,206 (11.7%)           | 4,471 (9.0%)                                                    | 2,362 (81.6%)                              |
| D                                                | 431 (11.5%)               | 1,246 (4.6%)            | 3,216 (6.5%)                                                    | 271 (9.4%)                                 |
| E                                                | 48 (1.3%)                 | 415 (1.5%)              | 835 (1.7%)                                                      | 6 (0.2%)                                   |
| F                                                | 223 (6.0%)                | 693 (2.5%)              | 2,768 (5.6%)                                                    | 11 (0.4%)                                  |
| G                                                | 8 (0.2%)                  | 890 (3.3%)              | 1,035 (2.1%)                                                    | 4 (0.1%)                                   |
| H                                                | 116 (3.1%)                | 2,325 (8.5%)            | 4,493 (9.1%)                                                    | 22 (0.8%)                                  |
| I                                                | 43 (1.2%)                 | 1,135 (4.1%)            | 3,759 (7.6%)                                                    | 15 (0.5%)                                  |
| J                                                | 562 (15.0%)               | 2,601 (9.5%)            | 5,261 (10.6%)                                                   | 11 (0.4%)                                  |
| K                                                | 760 (20.3%)               | 2,818 (10.3%)           | 6,186 (12.5%)                                                   | 56 (1.9%)                                  |
| L                                                | 338 (9.0%)                | 4,168 (15.2%)           | 5,725 (11.6%)                                                   | 46 (1.6%)                                  |
| M                                                | 327 (8.7%)                | 2,780 (10.1%)           | 5,122 (10.3%)                                                   | 27 (0.9%)                                  |
| Admission year                                   |                           |                         |                                                                 |                                            |
| 2015                                             | 246 (6.6%)                | 2,427 (8.9%)            | 4,677 (9.4%)                                                    | 822 (28.4%)                                |
| 2016                                             | 390 (10.4%)               | 3,312 (12.1%)           | 6,505 (13.1%)                                                   | 1,456 (50.3%)                              |
| 2017                                             | 548 (14.6%)               | 4,108 (15.0%)           | 8,008 (16.2%)                                                   | 261 (9.0%)                                 |
| 2018                                             | 655 (17.5%)               | 4,331 (15.8%)           | 8,423 (17.0%)                                                   | 97 (3.4%)                                  |
| 2019                                             | 573 (15.3%)               | 4,613 (16.8%)           | 8,061 (16.3%)                                                   | 121 (4.2%)                                 |
| 2020                                             | 923 (24.6%)               | 5,391 (19.7%)           | 8,982 (18.1%)                                                   | 79 (2.7%)                                  |
| 2021                                             | 412 (11.0%)               | 3,223 (11.8%)           | 4,917 (9.9%)                                                    | 59 (2.0%)                                  |
| Admission season                                 |                           |                         |                                                                 |                                            |
| Winter                                           | 974 (26.0%)               | 6,887 (25.1%)           | 12,599 (25.4%)                                                  | 764 (26.4%)                                |
| Spring                                           | 996 (26.6%)               | 6,837 (25.0%)           | 12,464 (25.1%)                                                  | 655 (22.6%)                                |
| Summer                                           | 901 (24.1%)               | 7,005 (25.6%)           | 12,455 (25.1%)                                                  | 713 (24.6%)                                |
| Autumn                                           | 876 (23.4%)               | 6,676 (24.4%)           | 12,055 (24.3%)                                                  | 763 (26.4%)                                |
| Modified Charlson comorbidity index<br>Mean (SD) | 1.6 (1.8)                 | 1.7 (1.9)               | 1.0 (1.6)                                                       | 1.0 (1.7)                                  |
| Risk factors for ventricular arrhythmia          |                           |                         |                                                                 |                                            |
| Coronary artery disease                          | 94 (2.5%)                 | 728 (2.7%)              | 932 (1.9%)                                                      | 91 (3.1%)                                  |
| Prior myocardial infarction                      | 68 (1.8%)                 | 551 (2.0%)              | 781 (1.6%)                                                      | 89 (3.1%)                                  |
| Cardiomyopathy                                   | 43 (1.2%)                 | 251 (0.9%)              | 396 (0.8%)                                                      | 22 (0.8%)                                  |
| Heart failure                                    | 484 (12.9%)               | 3,407 (12.4%)           | 4,933 (10.0%)                                                   | 327 (11.3%)                                |
| Prior ventricular arrhythmia                     | 7 (0.2%)                  | 69 (0.3%)               | 129 (0.3%)                                                      | 7 (0.2%)                                   |
| Chronic kidney disease                           | 203 (5.4%)                | 1,748 (6.4%)            | 2,262 (4.6%)                                                    | 271 (9.4%)                                 |
| Abnormal serum potassium level at admission      | 1,706 (45.5%)             | 11,614 (42.4%)          | 20,264 (40.9%)                                                  | 100 (3.5%)                                 |
| mLAPS score Mean (SD)                            | 27.0 (18.5)               | 24.5 (16.8)             | 22.6 (16.2)                                                     | 32.2 (19.8)                                |
| ICU admission prior to ceftriaxone and PPI       | 349 (9.3%)                | 509 (1.9%)              | N/A                                                             | N/A                                        |
| Admitting main responsible diagnosis             |                           |                         |                                                                 |                                            |
| Pneumonia                                        | 251 (6.7%)                | 1,881 (6.9%)            | 3,758 (7.6%)                                                    | 267 (9.2%)                                 |
| Urinary tract infection                          | 203 (5.4%)                | 1,642 (6.0%)            | 3,485 (7.0%)                                                    | 182 (6.3%)                                 |
| Aspiration                                       | 418 (11.2%)               | 718 (2.6%)              | 2,061 (4.2%)                                                    | 89 (3.1%)                                  |
| COPD with lower respiratory tract infection      | 109 (2.9%)                | 1,166 (4.3%)            | 1,712 (3.5%)                                                    | 98 (3.4%)                                  |
| Congestive heart failure                         | 103 (2.8%)                | 1,030 (3.8%)            | 1,544 (3.1%)                                                    | 82 (2.8%)                                  |
| COPD exacerbation                                | 47 (1.3%)                 | 874 (3.2%)              | 1,472 (3.0%)                                                    | 90 (3.1%)                                  |
| Sepsis                                           | 107 (2.9%)                | 555 (2.0%)              | 1,224 (2.5%)                                                    | 59 (2.0%)                                  |
| COVID-19 infection                               | 144 (3.8%)                | 448 (1.6%)              | 986 (2.0%)                                                      | 8 (0.3%)                                   |

|                                                               | Lansoprazole<br>(N=3,747) | Other PPI<br>(N=27,405) | Excluded patients<br>on ceftriaxone and<br>no PPI<br>(N=49,573) | Patients with<br>missing data<br>(N=2,895) |
|---------------------------------------------------------------|---------------------------|-------------------------|-----------------------------------------------------------------|--------------------------------------------|
| Cellulitis involving limb                                     | 15 (0.4%)                 | 293 (1.1%)              | 1,020 (2.1%)                                                    | 76 (2.6%)                                  |
| Acute renal failure                                           | 53 (1.4%)                 | 326 (1.6%)              | 777 (1.6%)                                                      | 47 (1.6%)                                  |
| Medications taken during ceftriaxone therapy                  |                           |                         |                                                                 |                                            |
| Quinolones                                                    | 162 (4.3%)                | 796 (2.9%)              | 1,397 (2.8%)                                                    | 213 (7.4%)                                 |
| Macrolides                                                    | 109 (2.9%)                | 536 (2.0%)              | 1,015 (2.1%)                                                    | 31 (1.1%)                                  |
| Cardiac medications associated with<br>ventricular arrhythmia | 226 (6.0%)                | 615 (2.2%)              | 863 (1.7%)                                                      | 89 (3.1%)                                  |
| Other medications associated with ventricular<br>arrhythmia   | 704 (18.8%)               | 3,532 (12.9%)           | 5,200 (10.5%)                                                   | 336 (11.6%)                                |
| Outcome                                                       |                           |                         |                                                                 |                                            |
| Ventricular arrhythmia or cardiac arrest                      | 126 (3.4%)                | 319 (1.2%)              | 402 (0.8%)                                                      | 38 (1.3%)                                  |
| In-hospital mortality                                         | 746 (19.9%)               | 2,762 (10.1%)           | 4,821 (9.7%)                                                    | 309 (10.7%)                                |

COPD = chronic obstructive pulmonary disease; ICU = intensive care unit; mLAPS = modified laboratory-based acute physiology score; N/A = not applicable; SD = standard deviation

eTable 5. Proportion of patients who were also prescribed another proton pump inhibitor during hospital stay in the lansoprazole and other proton pump inhibitor group

|                  | Lansoprazole group (N=3,747) | Pantoprazole group (N=25,699) | Rabeprazole group (N=1,062) | Esomeprazole group (N=434) | Omeprazole group (N=210) |
|------------------|------------------------------|-------------------------------|-----------------------------|----------------------------|--------------------------|
| Lansoprazole use | 3,747 (100%)                 | 0 (0%)                        | 0 (0%)                      | 0 (0%)                     | 0 (0%)                   |
| Pantoprazole use | 1,662 (44.4%)                | 25,699 (100%)                 | 123 (11.6%)                 | 163 (37.6%)                | 40 (19.1%)               |
| Rabeprazole use  | 68 (1.8%)                    | 0 (0%)                        | 1,062 (100%)                | 3 (0.7%)                   | 6 (2.9%)                 |
| Esomeprazole use | 29 (0.8%)                    | 0 (0%)                        | 0 (0%)                      | 434 (100%)                 | 2 (1.0%)                 |
| Omeprazole use   | 17 (0.5%)                    | 0 (0%)                        | 0 (0%)                      | 0 (0%)                     | 210 (100%)               |

Within the lansoprazole group who were also prescribed another proton pump inhibitor, lansoprazole accounts for median of 50% (interquartile range 50% to 67%) of the total duration of proton pump inhibitor use. In 77% cases, lansoprazole accounted for the majority of the total duration of proton pump inhibitor use.

eTable 6. Hospital sites description

| Hospital site | Bed size | Description                                                                                   | Proton pump inhibitor distribution                                                                                                                     | Event rates                                                                                               |
|---------------|----------|-----------------------------------------------------------------------------------------------|--------------------------------------------------------------------------------------------------------------------------------------------------------|-----------------------------------------------------------------------------------------------------------|
| A             | 496      | Academic                                                                                      | Total: 5,570<br>Lansoprazole: 452 (8.1%)<br>Esomeprazole: 15 (0.3%)<br>Omeprazole: 11 (0.2%)<br>Pantoprazole: 5,086 (91.3%)<br>Rabeprazole: 6 (0.1%)   | Total: 5,570<br>Ventricular arrhythmia or cardiac arrest: 43 (0.8%)<br>In-hospital mortality: 574 (10.3%) |
| B             | 556      | Community                                                                                     | Total: 10<br>Lansoprazole: 0 (0%)<br>Esomeprazole: 0 (0%)<br>Omeprazole: 0 (0%)<br>Pantoprazole: 10 (100%)<br>Rabeprazole: 0 (0%)                      | Total: 10<br>Ventricular arrhythmia or cardiac arrest: 0 (0%)<br>In-hospital mortality: 1 (10.0%)         |
| C             | 457      | Community                                                                                     | Total: 3,645<br>Lansoprazole: 439 (12.0%)<br>Esomeprazole: 12 (0.3%)<br>Omeprazole: 4 (0.1%)<br>Pantoprazole: 3,177 (87.2%)<br>Rabeprazole: 13 (0.4%)  | Total: 3,645<br>Ventricular arrhythmia or cardiac arrest: 49 (1.3%)<br>In-hospital mortality: 316 (8.7%)  |
| D             | 753      | Academic<br>Centre of excellence for obstetrics medicine, gastroenterology, surgical oncology | Total: 1,677<br>Lansoprazole: 431 (25.7%)<br>Esomeprazole: 39 (2.3%)<br>Omeprazole: 76 (4.5%)<br>Pantoprazole: 1,046 (62.4%)<br>Rabeprazole: 85 (5.1%) | Total: 1,677<br>Ventricular arrhythmia or cardiac arrest: 35 (2.1%)<br>In-hospital mortality: 221 (13.2%) |
| E             | 354      | Community                                                                                     | Total: 463<br>Lansoprazole: 48 (10.4%)<br>Esomeprazole: 6 (1.3%)<br>Omeprazole: 21 (4.5%)<br>Pantoprazole: 91 (19.7%)<br>Rabeprazole: 297 (64.2%)      | Total: 463<br>Ventricular arrhythmia or cardiac arrest: 5 (1.1%)<br>In-hospital mortality: 74 (15.9%)     |
| F             | 1,096    | Academic<br>Trauma centre                                                                     | Total: 916<br>Lansoprazole: 223 (24.3%)<br>Esomeprazole: 10 (1.1%)<br>Omeprazole: 46 (5.0%)<br>Pantoprazole: 566 (61.8%)                               | Total: 916<br>Ventricular arrhythmia or cardiac arrest: 22 (2.4%)<br>In-hospital mortality: 78 (8.5%)     |



| Hospital site | Bed size | Description                                                                                 | Proton pump inhibitor distribution                                                                                                                                      | Event rates                                                                                               |
|---------------|----------|---------------------------------------------------------------------------------------------|-------------------------------------------------------------------------------------------------------------------------------------------------------------------------|-----------------------------------------------------------------------------------------------------------|
| G             | 191      | Community                                                                                   | Rabeprazole: 71 (7.8%)<br>Total: 898<br>Lansoprazole: 8 (0.9%)<br>Esomeprazole: 13 (1.5%)<br>Omeprazole: 1 (0.1%)<br>Pantoprazole: 874 (97.3%)<br>Rabeprazole: 2 (0.2%) | Total: 898<br>Ventricular arrhythmia or cardiac arrest: 9 (1.0%)<br>In-hospital mortality: 110 (12.3%)    |
| H             | 527      | Academic<br>Trauma centre<br>Centre of excellence for care of homeless and disadvantaged    | Total: 2,441<br>Lansoprazole: 116 (4.8%)<br>Esomeprazole: 108 (4.4%)<br>Omeprazole: 0 (0%)<br>Pantoprazole: 2,052 (84.1%)<br>Rabeprazole: 165 (6.8%)                    | Total: 2,441<br>Ventricular arrhythmia or cardiac arrest: 19 (0.8%)<br>In-hospital mortality: 216 (8.9%)  |
| I             | 366      | Community                                                                                   | Total: 1,178<br>Lansoprazole: 43 (3.7%)<br>Esomeprazole: 0 (0%)<br>Omeprazole: 11 (0.9%)<br>Pantoprazole: 1,086 (92.2%)<br>Rabeprazole: 38 (3.2%)                       | Total: 1,178<br>Ventricular arrhythmia or cardiac arrest: 30 (2.6%)<br>In-hospital mortality: 170 (14.4%) |
| J             | 382      | Community                                                                                   | Total: 3,163<br>Lansoprazole: 562 (17.8%)<br>Esomeprazole: 9 (0.3%)<br>Omeprazole: 15 (0.5%)<br>Pantoprazole: 2,195 (69.4%)<br>Rabeprazole: 382 (12.1%)                 | Total: 3,163<br>Ventricular arrhythmia or cardiac arrest: 51 (1.6%)<br>In-hospital mortality: 324 (10.2%) |
| K             | 751      | Community                                                                                   | Total: 3,578<br>Lansoprazole: 760 (21.2%)<br>Esomeprazole: 8 (0.2%)<br>Omeprazole: 20 (0.6%)<br>Pantoprazole: 2,790 (78.0%)<br>Rabeprazole: 0 (0%)                      | Total: 3,578<br>Ventricular arrhythmia or cardiac arrest: 71 (2.0%)<br>In-hospital mortality: 570 (15.9%) |
| L             | 417      | Academic<br>Centre of excellence for cardiology, cardiac surgery and solid organ transplant | Total: 4,506<br>Lansoprazole: 338 (7.5%)<br>Esomeprazole: 88 (2.0%)<br>Omeprazole: 5 (0.1%)<br>Pantoprazole: 4,072 (90.4%)                                              | Total: 4,506<br>Ventricular arrhythmia or cardiac arrest: 72 (1.6%)<br>In-hospital mortality: 547 (12.1%) |

|               |          |                                                                    | Rabeprazole: 3 (0.1%)                                                                                                                             |                                                                                                             |
|---------------|----------|--------------------------------------------------------------------|---------------------------------------------------------------------------------------------------------------------------------------------------|-------------------------------------------------------------------------------------------------------------|
| Hospital site | Bed size | Description                                                        | Proton pump inhibitor distribution                                                                                                                | Event rates                                                                                                 |
| M             | 272      | Academic<br>Centre of excellence for<br>neurosurgery and neurology | Total: 3,107<br>Lansoprazole: 327 (10.5%)<br>Esomeprazole: 126 (4.1%)<br>Omeprazole: 0 (0%)<br>Pantoprazole: 2,654 (85.4%)<br>Rabeprazole: 0 (0%) | Total: 3,107<br>Ventricular arrhythmia or cardiac<br>arrest: 39 (1.3%)<br>In-hospital mortality: 307 (9.9%) |

eTable 7. The association of a priori selected predictor with ventricular arrhythmia or cardiac arrest in logistic regression model

| Predictors                                                 | Univariate<br>Unadjusted OR (95% CI) | Multivariable<br>Adjusted OR (95% CI) |
|------------------------------------------------------------|--------------------------------------|---------------------------------------|
| Age per year                                               | 1.00 (0.99 to 1.00)                  | 1.00 (0.99 to 1.00)                   |
| Sex                                                        |                                      |                                       |
| Female                                                     | Reference                            | Reference                             |
| Male                                                       | 1.40 (1.16 to 1.70)                  | 1.35 (1.11 to 1.64)                   |
| Modified Charlson comorbidity index per point              | 1.10 (1.05 to 1.15)                  | 1.09 (1.04 to 1.14)                   |
| Risk factors for ventricular arrhythmias                   |                                      |                                       |
| Coronary artery disease                                    | 1.02 (0.54 to 1.74)                  | 1.34 (0.70 to 2.31)                   |
| Prior myocardial infarction                                | 1.99 (1.17 to 3.14)                  | 2.35 (1.35 to 3.81)                   |
| Cardiomyopathy                                             | 4.08 (2.35 to 6.59)                  | 3.59 (2.00 to 5.99)                   |
| Heart failure                                              | 2.22 (1.78 to 2.76)                  | 2.69 (2.10 to 3.42)                   |
| Prior arrhythmia                                           | 1.87 (0.31 to 5.96)                  | 1.65 (0.26 to 5.65)                   |
| Chronic kidney disease                                     | 1.16 (0.79 to 1.64)                  | 1.38 (0.93 to 1.98)                   |
| Abnormal serum potassium level at admission                | 1.59 (1.32 to 1.92)                  | 1.34 (1.10 to 1.62)                   |
| mLAPS score                                                | 1.02 (1.01 to 1.02)                  | 1.01 (1.01 to 1.02)                   |
| ICU admission prior to ceftriaxone and PPI                 | 5.84 (4.37 to 7.67)                  | 2.12 (1.49 to 2.99)                   |
| Medications taken during ceftriaxone therapy               |                                      |                                       |
| Quinolones                                                 | 1.49 (0.92 to 2.29)                  | 0.83 (0.50 to 1.31)                   |
| Macrolides                                                 | 1.32 (0.70 to 2.24)                  | 0.62 (0.32 to 1.09)                   |
| Cardiac medications associated with ventricular arrhythmia | 5.97 (4.47 to 7.85)                  | 2.48 (1.75 to 3.48)                   |
| Other medications associated with ventricular arrhythmia   | 2.28 (1.83 to 2.81)                  | 1.59 (1.24 to 2.02)                   |
| Lansoprazole                                               | 2.95 (2.39 to 3.63)                  | 2.33 (1.86 to 2.91)                   |

CI = confidence interval; ICU = intensive care unit; OR = odds ratio; PPI = proton pump inhibitor

eTable 8. Risk of ventricular arrhythmia or cardiac arrest, and in-hospital mortality per year from 2015 to 2021

|                                                  | 2015          | 2016          | 2017          | 2018          | 2019          | 2020          | 2021          |
|--------------------------------------------------|---------------|---------------|---------------|---------------|---------------|---------------|---------------|
| Total number of patients                         | 2,673         | 3,702         | 4,656         | 4,986         | 5,186         | 6,314         | 3,635         |
| Ventricular arrhythmia or cardiac arrest         |               |               |               |               |               |               |               |
| Number of events                                 | 56 (2.1%)     | 53 (1.4%)     | 73 (1.6%)     | 70 (1.4%)     | 73 (1.4%)     | 81 (1.3%)     | 39 (1.1%)     |
| Lansoprazole vs other PPI<br>Risk ratio (95% CI) | 1.6 (0.8-3.4) | 1.7 (0.9-3.5) | 3.0 (1.8-5.0) | 3.0 (1.8-5.0) | 3.3 (2.0-5.4) | 4.2 (2.7-6.5) | 3.1 (1.5-6.1) |
| In-hospital mortality                            |               |               |               |               |               |               |               |
| Number of events                                 | 298 (11.2%)   | 419 (11.3%)   | 517 (11.1%)   | 540 (10.8%)   | 585 (11.3%)   | 708 (11.2%)   | 441 (12.1%)   |
| Lansoprazole vs other PPI<br>Risk ratio (95% CI) | 1.9 (1.4-2.5) | 1.8 (1.5-2.3) | 1.8 (1.5-2.2) | 2.1 (1.8-2.5) | 2.3 (1.9-2.7) | 2.1 (1.8-2.4) | 1.7 (1.4-2.2) |

eTable 9. Baseline characteristics within subgroup analysis of patients not admitted to ICU prior to ceftriaxone and PPI

|                                                  | Lansoprazole<br>(N=3,398) | Other PPI<br>(N=26,896) | ASMD  |
|--------------------------------------------------|---------------------------|-------------------------|-------|
| Age Mean (SD)                                    | 74.7 (15.8)               | 71.6 (16.0)             | 0.198 |
| Sex                                              |                           |                         |       |
| Female                                           | 1,633 (48.1%)             | 13,035 (48.5%)          | 0.008 |
| Male                                             | 1,765 (51.9%)             | 13,861 (51.5%)          | 0.008 |
| From a long-term care home                       | 563 (16.6%)               | 1,570 (5.8%)            | 0.345 |
| Hospital sites                                   |                           |                         |       |
| A                                                | 407 (12.0%)               | 5,074 (18.9%)           | 0.192 |
| B                                                | 0 (0%)                    | 10 (0.04%)              | 0.027 |
| C                                                | 387 (11.4%)               | 3,152 (11.7%)           | 0.010 |
| D                                                | 374 (11.0%)               | 1,153 (4.3%)            | 0.255 |
| E                                                | 47 (1.4%)                 | 415 (1.5%)              | 0.013 |
| F                                                | 211 (6.2%)                | 681 (2.5%)              | 0.181 |
| G                                                | 8 (0.2%)                  | 865 (3.2%)              | 0.230 |
| H                                                | 87 (2.6%)                 | 2,234 (8.3%)            | 0.256 |
| I                                                | 40 (1.2%)                 | 1,106 (4.1%)            | 0.184 |
| J                                                | 536 (15.8%)               | 2,588 (9.6%)            | 0.186 |
| K                                                | 722 (21.3%)               | 2,791 (10.4%)           | 0.301 |
| L                                                | 303 (8.9%)                | 4,104 (15.3%)           | 0.195 |
| M                                                | 276 (8.1%)                | 2,723 (10.1%)           | 0.070 |
| Admission year                                   |                           |                         |       |
| 2015                                             | 217 (6.4%)                | 2,345 (8.7%)            | 0.088 |
| 2016                                             | 360 (10.6%)               | 3,245 (12.1%)           | 0.046 |
| 2017                                             | 514 (15.1%)               | 4,024 (15.0%)           | 0.005 |
| 2018                                             | 609 (17.9%)               | 4,263 (15.9%)           | 0.055 |
| 2019                                             | 508 (15.0%)               | 4,545 (16.9%)           | 0.053 |
| 2020                                             | 821 (24.2%)               | 5,310 (19.7%)           | 0.107 |
| 2021                                             | 369 (10.9%)               | 3,164 (11.8%)           | 0.029 |
| Admission season                                 |                           |                         |       |
| Winter                                           | 888 (26.1%)               | 6,772 (25.2%)           | 0.022 |
| Spring                                           | 903 (26.6%)               | 6,705 (24.9%)           | 0.038 |
| Summer                                           | 819 (24.1%)               | 6,878 (25.6%)           | 0.034 |
| Autumn                                           | 788 (23.2%)               | 6,541 (24.3%)           | 0.027 |
| Modified Charlson comorbidity index<br>Mean (SD) | 1.3 (1.7)                 | 1.4 (1.9)               | 0.075 |
| Risk factors for ventricular arrhythmia          |                           |                         |       |
| Coronary artery disease                          | 86 (2.5%)                 | 713 (2.7%)              | 0.008 |
| Prior myocardial infarction                      | 59 (1.7%)                 | 522 (1.9%)              | 0.015 |
| Cardiomyopathy                                   | 33 (1.0%)                 | 240 (0.9%)              | 0.008 |
| Heart failure                                    | 438 (12.9%)               | 3,351 (12.5%)           | 0.013 |
| Prior ventricular arrhythmia                     | <6 (<0.2%)                | 64 (0.2%)               | 0.029 |
| Chronic kidney disease                           | 178 (5.2%)                | 1,721 (6.4%)            | 0.050 |
| Abnormal serum potassium level at admission      | 1,505 (44.3%)             | 11,317 (42.1%)          | 0.045 |
| mLAPS score Mean (SD)                            | 26.3 (17.6)               | 24.3 (16.5)             | 0.119 |
| ICU admission prior to ceftriaxone and PPI       | 0 (0%)                    | 0 (0%)                  | 0     |
|                                                  |                           |                         |       |

|                                                            | Lansoprazole<br>(N=3,398) | Other PPI<br>(N=26,896) | ASMD  |
|------------------------------------------------------------|---------------------------|-------------------------|-------|
| Admitting main responsible diagnosis                       |                           |                         |       |
| Pneumonia                                                  | 240 (7.1%)                | 1,874 (7.0%)            | 0.004 |
| Urinary tract infection                                    | 200 (5.9%)                | 1,634 (6.1%)            | 0.008 |
| Aspiration                                                 | 404 (11.9%)               | 703 (2.6%)              | 0.364 |
| COPD with lower respiratory tract infection                | 101 (3.0%)                | 1,154 (4.3%)            | 0.071 |
| Congestive heart failure                                   | 96 (2.8%)                 | 1,022 (3.8%)            | 0.054 |
| COPD exacerbation                                          | 42 (1.2%)                 | 863 (3.2%)              | 0.134 |
| Sepsis                                                     | 105 (3.1%)                | 523 (1.9%)              | 0.073 |
| COVID-19 infection                                         | 114 (3.4%)                | 435 (1.6%)              | 0.112 |
| Cellulitis involving limb                                  | 15 (0.4%)                 | 292 (1.1%)              | 0.074 |
| Acute renal failure                                        | 48 (1.4%)                 | 420 (1.6%)              | 0.012 |
| Medications taken during ceftriaxone therapy               |                           |                         |       |
| Quinolones                                                 | 115 (3.4%)                | 749 (2.8%)              | 0.035 |
| Macrolides                                                 | 59 (1.7%)                 | 476 (1.8%)              | 0.003 |
| Cardiac medications associated with ventricular arrhythmia | 87 (2.6%)                 | 489 (1.8%)              | 0.051 |
| Other medications associated with ventricular arrhythmia   | 517 (15.2%)               | 3,314 (12.3%)           | 0.084 |

Abbreviations: ASMD = absolute standardized mean difference; COPD = chronic obstructive pulmonary disease; ICU = intensive care unit; mLAPS = modified laboratory-based acute physiology score; PPI = proton pump inhibitor; SD = standard deviation

eTable 10. Outcomes within subgroup analysis of patients not admitted to ICU prior to ceftriaxone and PPI

|                                                | Lansoprazole<br>(N=3,398) | Other PPI<br>(N=26,896) | Unadjusted risk (95% CI)<br>P-value <sup>a</sup>                | Adjusted risk by overlap<br>weight (95% CI)         |
|------------------------------------------------|---------------------------|-------------------------|-----------------------------------------------------------------|-----------------------------------------------------|
| Ventricular<br>arrhythmia or<br>cardiac arrest | 90 (2.7%)                 | 295 (1.1%)              | RD in %: 1.6 (1.0 to 2.2)<br>RR: 2.4 (1.9 to 3.0)<br>P<0.0001   | RD in %: 1.6 (1.0 to 2.2)<br>RR: 2.4 (1.8 to 3.0)   |
| All cause in-<br>hospital<br>mortality         | 670 (19.7%)               | 2,668 (9.9%)            | RD in %: 9.8 (8.4 to 11.2)<br>RR: 2.0 (1.8 to 2.1)<br>P<0.0001  | RD in %: 7.8 (6.4 to 9.2)<br>RR: 1.7 (1.5 to 1.8)   |
| Transfer to ICU                                | 126 (3.7%)                | 1,192 (4.4%)            | RD in %: -0.7 (-1.4 to 0.0)<br>RR: 0.8 (0.7 to 1.0)<br>P=0.0569 | RD in %: -0.1 (-0.8 to 0.6)<br>RR: 1.0 (0.8 to 1.2) |

<sup>a</sup>P-value by Chi squared test

eTable 11. Baseline characteristics within subgroup analysis of patients who received either only lansoprazole or only pantoprazole without being exposed to any other PPI during hospital stay

|                                                  | Lansoprazole only<br>(N=1,991) | Pantoprazole only<br>(N=25,699) | ASMD  |
|--------------------------------------------------|--------------------------------|---------------------------------|-------|
| Age Mean (SD)                                    | 73.1 (16.5)                    | 71.3 (16.1)                     | 0.112 |
| Sex                                              |                                |                                 |       |
| Female                                           | 943 (47.4%)                    | 12,317 (47.9%)                  | 0.011 |
| Male                                             | 1,048 (52.6%)                  | 13,382 (52.1%)                  | 0.011 |
| From a long-term care home                       | 303 (15.2%)                    | 1,479 (5.8%)                    | 0.313 |
| Hospital sites                                   |                                |                                 |       |
| A                                                | 172 (8.6%)                     | 5,086 (19.8%)                   | 0.324 |
| B                                                | 0 (0%)                         | 10 (0.04%)                      | 0.028 |
| C                                                | 251 (12.6%)                    | 3,177 (12.4%)                   | 0.007 |
| D                                                | 297 (14.9%)                    | 1,046 (4.1%)                    | 0.377 |
| E                                                | 26 (1.3%)                      | 91 (0.4%)                       | 0.105 |
| F                                                | 147 (7.4%)                     | 566 (2.2%)                      | 0.244 |
| G                                                | 0 (0%)                         | 874 (3.4%)                      | 0.265 |
| H                                                | 76 (3.8%)                      | 2,052 (8.0%)                    | 0.178 |
| I                                                | 20 (1.0%)                      | 1,086 (4.2%)                    | 0.203 |
| J                                                | 217 (10.9%)                    | 2,195 (8.5%)                    | 0.080 |
| K                                                | 328 (16.5%)                    | 2,790 (10.9%)                   | 0.164 |
| L                                                | 227 (11.4%)                    | 4,072 (15.8%)                   | 0.130 |
| M                                                | 230 (11.6%)                    | 2,654 (10.3%)                   | 0.039 |
| Admission year                                   |                                |                                 |       |
| 2015                                             | 128 (6.4%)                     | 2,192 (8.5%)                    | 0.080 |
| 2016                                             | 183 (9.2%)                     | 3,018 (11.7%)                   | 0.083 |
| 2017                                             | 282 (14.2%)                    | 3,844 (15.0%)                   | 0.023 |
| 2018                                             | 326 (16.4%)                    | 4,123 (16.0%)                   | 0.009 |
| 2019                                             | 311 (15.6%)                    | 4,428 (17.2%)                   | 0.043 |
| 2020                                             | 518 (26.0%)                    | 5,081 (19.8%)                   | 0.149 |
| 2021                                             | 243 (12.2%)                    | 3,013 (11.7%)                   | 0.015 |
| Admission season                                 |                                |                                 |       |
| Winter                                           | 506 (25.4%)                    | 6,436 (25.0%)                   | 0.009 |
| Spring                                           | 546 (27.4%)                    | 6,414 (25.0%)                   | 0.056 |
| Summer                                           | 482 (24.2%)                    | 6,582 (25.6%)                   | 0.032 |
| Autumn                                           | 457 (23.0%)                    | 6,267 (24.4%)                   | 0.034 |
| Modified Charlson comorbidity index<br>Mean (SD) | 1.1 (1.6)                      | 1.4 (1.9)                       | 0.147 |
| Risk factors for ventricular arrhythmia          |                                |                                 |       |
| Coronary artery disease                          | 49 (2.5%)                      | 685 (2.7%)                      | 0.013 |
| Prior myocardial infarction                      | 34 (1.7%)                      | 526 (2.1%)                      | 0.025 |
| Cardiomyopathy                                   | 23 (1.2%)                      | 235 (0.9%)                      | 0.024 |
| Heart failure                                    | 242 (12.2%)                    | 3,192 (12.4%)                   | 0.008 |
| Prior ventricular arrhythmia                     | 6 (0.3%)                       | 66 (0.3%)                       | 0.008 |
| Chronic kidney disease                           | 101 (5.1%)                     | 1,666 (6.5%)                    | 0.060 |
| Abnormal serum potassium level at admission      | 893 (44.9%)                    | 10,865 (42.3%)                  | 0.052 |
| mLAPS score Mean (SD)                            | 25.8 (18.1)                    | 24.5 (16.8)                     | 0.074 |
| ICU admission prior to ceftriaxone and PPI       | 214 (10.8%)                    | 475 (1.9%)                      | 0.373 |



|                                                            | Lansoprazole only<br>(N=1,991) | Pantoprazole only<br>(N=25,699) | ASMD  |
|------------------------------------------------------------|--------------------------------|---------------------------------|-------|
| Admitting main responsible diagnosis                       |                                |                                 |       |
| Pneumonia                                                  | 139 (7.0%)                     | 1,734 (6.8%)                    | 0.009 |
| Urinary tract infection                                    | 111 (5.6%)                     | 1,479 (5.8%)                    | 0.008 |
| Aspiration                                                 | 243 (12.2%)                    | 648 (2.5%)                      | 0.377 |
| COPD with lower respiratory tract infection                | 56 (2.8%)                      | 1,063 (4.1%)                    | 0.072 |
| Congestive heart failure                                   | 47 (2.4%)                      | 967 (3.8%)                      | 0.081 |
| COPD exacerbation                                          | 22 (1.1%)                      | 832 (3.2%)                      | 0.147 |
| Sepsis                                                     | 50 (2.5%)                      | 516 (2.0%)                      | 0.034 |
| COVID-19 infection                                         | 89 (4.5%)                      | 437 (1.7%)                      | 0.161 |
| Cellulitis involving limb                                  | 11 (0.6%)                      | 271 (1.1%)                      | 0.056 |
| Acute renal failure                                        | 27 (1.4%)                      | 403 (1.6%)                      | 0.018 |
| Medications taken during ceftriaxone therapy               |                                |                                 |       |
| Quinolones                                                 | 104 (5.2%)                     | 754 (2.9%)                      | 0.116 |
| Macrolides                                                 | 69 (3.5%)                      | 505 (2.0%)                      | 0.092 |
| Cardiac medications associated with ventricular arrhythmia | 142 (7.1%)                     | 583 (2.3%)                      | 0.231 |
| Other medications associated with ventricular arrhythmia   | 419 (21.0%)                    | 3,359 (13.1%)                   | 0.213 |

Abbreviations: ASMD = absolute standardized mean difference; COPD = chronic obstructive pulmonary disease; ICU = intensive care unit; mLAPS = modified laboratory-based acute physiology score; PPI = proton pump inhibitor; SD = standard deviation

eTable 12. Outcomes within subgroup analysis of patients who received either only lansoprazole or only pantoprazole without being exposed to any other PPI during hospital stay

|                                          | Lansoprazole only (N=1,991) | Pantoprazole only (N=25,699) | Unadjusted risk (95% CI) P-value <sup>a</sup>                 | Adjusted risk by overlap weight (95% CI)          |
|------------------------------------------|-----------------------------|------------------------------|---------------------------------------------------------------|---------------------------------------------------|
| Ventricular arrhythmia or cardiac arrest | 55 (2.8%)                   | 296 (1.2%)                   | RD in %: 1.6 (1.0 to 2.4)<br>RR: 2.4 (1.8 to 3.2)<br>P<0.0001 | RD in %: 1.1 (0.3 to 1.8)<br>RR: 1.7 (1.2 to 2.3) |
| All cause in-hospital mortality          | 342 (17.2%)                 | 2,609 (10.2%)                | RD in %: 7.0 (5.4 to 8.8)<br>RR: 1.7 (1.5 to 1.9)<br>P<0.0001 | RD in %: 4.8 (3.0 to 6.5)<br>RR: 1.4 (1.2 to 1.6) |

<sup>a</sup>P-value by Chi squared test

CI = confidence interval; RD = risk difference; RR = risk ratio

eTable 13. Sensitivity analysis of outcomes during hospital stay that includes patients with missing mLAPS and assumes best-worst-case scenario for unknown exposure<sup>a</sup>

| Outcome                                     | No. (%)                   |                         | Unadjusted risk (95% CI)<br>P-value                           |
|---------------------------------------------|---------------------------|-------------------------|---------------------------------------------------------------|
|                                             | Lansoprazole<br>(N=4,135) | Other PPI<br>(N=28,389) |                                                               |
| Ventricular arrhythmia<br>or cardiac arrest | 131 (3.2)                 | 332 (1.2)               | RD in %: 2.0 (1.5 to 2.6)<br>RR: 2.7 (2.2 to 3.3)<br>P<0.001  |
| All cause in-hospital<br>mortality          | 782 (18.9)                | 2,870 (10.1)            | RD in %: 8.8 (7.6 to 10.1)<br>RR: 1.9 (1.7 to 2.0)<br>P<0.001 |

<sup>a</sup>The best-worst-case scenario assigned all patients with unknown exposure and an event (ventricular arrhythmia, cardiac arrest, and/or in-hospital death) to the other PPI group, whereas all patients with unknown exposure and no event were assigned to the lansoprazole group

CI = confidence interval; PPI = proton pump inhibitor; RD = risk difference; RR = risk ratio

eTable 14. Other sensitivity analyses

| Sensitivity analysis                                                                  | Outcome                                  | Events                                                                   | Unadjusted risk (95% CI)                            | Adjusted risk by overlap weights (95% CI)          |
|---------------------------------------------------------------------------------------|------------------------------------------|--------------------------------------------------------------------------|-----------------------------------------------------|----------------------------------------------------|
| Adjusting for ceftriaxone and PPI duration in propensity score                        | Ventricular arrhythmia or cardiac arrest | Lansoprazole:<br>126/3,747 (3.4%)<br>Other PPI:<br>319/27,405 (1.2%)     | RD in %: 2.2 (1.7 to 2.8)<br>RR: 2.9 (2.4 to 3.5)   | RD in %: 1.7 (1.1 to 2.2)<br>RR: 2.1 (1.7 to 2.7)  |
|                                                                                       | All cause in-hospital mortality          | Lansoprazole:<br>746/3,747 (19.9%)<br>Other PPI:<br>2,762/27,405 (10.1%) | RD in %: 9.8 (8.5 to 11.2)<br>RR: 2.0 (1.8 to 2.1)  | RD in %: 7.4 (6.0 to 8.7)<br>RR: 1.6 (1.5 to 1.7)  |
| Including only patients who had ceftriaxone and PPI started within 1 day of admission | Ventricular arrhythmia or cardiac arrest | Lansoprazole:<br>26/1,720 (1.5%)<br>Other PPI:<br>180/21,528 (0.8%)      | RD in %: 0.7 (0.2 to 1.4)<br>RR: 1.8 (1.2 to 2.7)   | RD in %: 0.6 (0 to 1.3)<br>RR: 1.7 (1.1 to 2.6)    |
|                                                                                       | All cause in-hospital mortality          | Lansoprazole:<br>197/1,720 (11.5%)<br>Other PPI:<br>1,721/21,528 (8.0%)  | RD in %: 3.5 (2.0 to 5.1)<br>RR: 1.4 (1.2 to 1.6)   | RD in %: 2.3 (0.7 to 3.9)<br>RR: 1.3 (1.1 to 1.4)  |
| Subgroup analysis including only PPIs that are administered orally                    | Ventricular arrhythmia or cardiac arrest | Lansoprazole:<br>126/3,747 (3.4%)<br>Other PPI:<br>23/1,706 (1.4%)       | RD in %: 2.0 (1.2 to 2.8)<br>RR: 2.5 (1.6 to 3.9)   | RD in %: 1.2 (0.2 to 2.3)<br>RR: 1.3 (1.1 to 3.0)  |
|                                                                                       | All cause in-hospital mortality          | Lansoprazole:<br>746/3,747 (19.9%)<br>Other PPI:<br>153/1,706 (9.0%)     | RD in %: 10.9 (9.0 to 12.8)<br>RR: 2.2 (1.9 to 2.6) | RD in %: 8.5 (6.1 to 10.9)<br>RR: 1.9 (1.6 to 2.4) |

CI = confidence interval; PPI = proton pump inhibitor; RD = risk difference; RR = risk ratio
