# Supplementary material for: Ceftriaxone and the Risk of Ventricular Arrhythmia, Cardiac Arrest, and Death Among Patients Receiving Lansoprazole
Source: PubMed Central journal article supplement (PMC10603497; doi:10.1001/jamanetworkopen.2023.39893), 2023-10-26
Supplement: jamanetwopen-e2339893-s002.pdf [file jamanetwopen-e2339893-s002.pdf]

## Data Sharing Statement

Bai. Ceftriaxone and the Risk of Ventricular Arrhythmia, Cardiac Arrest, and Death Among Patients Receiving Lansoprazole. *JAMA Netw Open*. Published October 26, 2023.  
doi:10.1001/jamanetworkopen.2023.39893

### Data

**Data available:** No
